# Supplementary material for: Solubilization of sulfuric acid lignin by ball mill treatment with excess amounts of organic compounds
Source: Royal Society of Chemistry journal article supplement (doi:10.1039/d2ra07235a), 2023-01-01
Supplement: d2ra07235a1.pdf [file d2ra07235a1.pdf]

**Supporting Information for**

**Solubilization of sulfuric acid lignin by ball mill treatment with excess amounts of  
organic compounds**

Masatsugu Takada,<sup>\*a,b</sup> Yutaka Okazaki,<sup>\*a</sup>, Haruo Kawamoto,<sup>a</sup> and Takashi Sagawa<sup>a</sup>

a Graduate School of Energy Science, Kyoto University, Yoshida-Honmachi, Kyoto  
606-8501, Japan

b Graduate School of Bio-Applications and Systems Engineering (BASE), Tokyo  
University of Agriculture and Technology, 2-24-16, Nakacho Koganeishi, Tokyo 184-  
8588, Japan

\*Corresponding authors:

Dr. M. Takada; [takada-masatsugu@go.tuat.ac.jp](mailto:takada-masatsugu@go.tuat.ac.jp)

Dr. Y. Okazaki; [okazaki.yutaka.8c@kyoto-u.ac.jp](mailto:okazaki.yutaka.8c@kyoto-u.ac.jp)

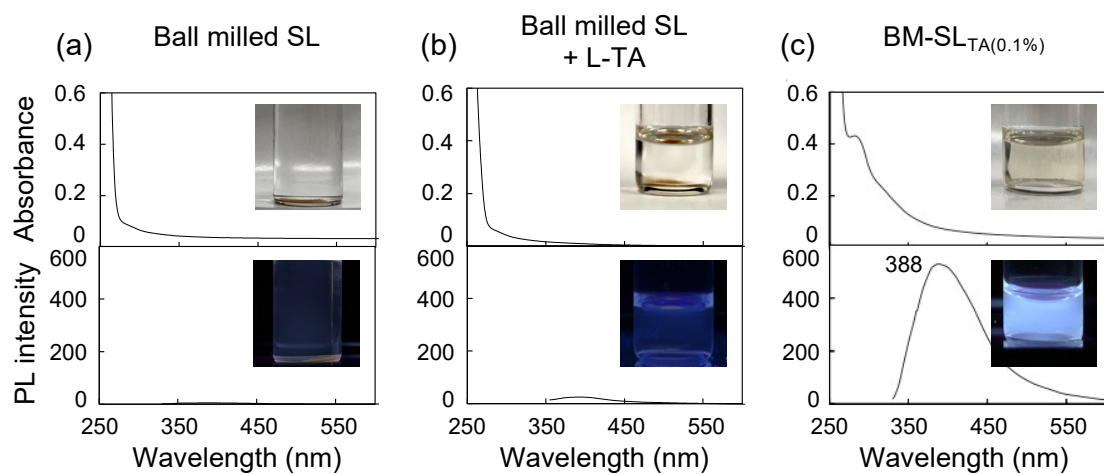

Figure S1 Pictures of (a) ball milled sulfuric acid lignin (SL) DMF solution at  $0.1 \text{ mg mL}^{-1}$ , (b) DMF solution of ball milled SL at  $0.1 \text{ mg mL}^{-1}$  with addition of L-tartaric acid (L-TA) at  $100 \text{ mg mL}^{-1}$ , and (c) DMF solution of BM-SL<sub>TA(0.1%)</sub> at  $0.1 \text{ mg mL}^{-1}$ , and their UV-Vis absorbance and PL spectra excited at 320 nm. The inserted pictures as indicated below were taken under the irradiation of UV light at 365 nm.

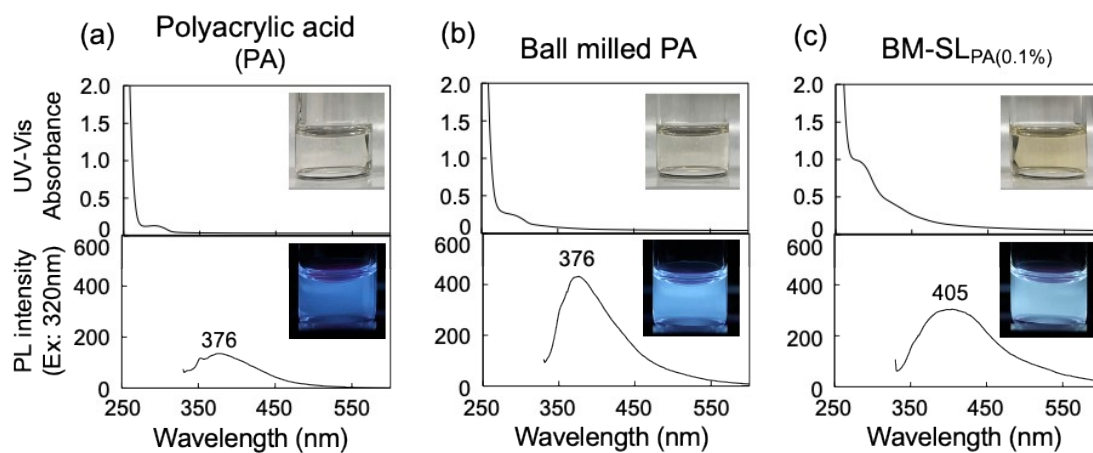

Figure S2 Pictures of (a) polyacrylic acid (PA), (b) ball milled PA, and (c) BM-SL<sub>PA(0.1%)</sub>, and their UV-Vis absorbance and PL spectra excited at 320 nm. The inserted pictures as indicated below were taken under the irradiation of UV light at 365 nm.
